# Supplementary material for: Altered expression of protein tyrosine phosphatase, non-receptor type 22 isoforms in systemic lupus erythematosus
Source: PubMed Central journal article supplement (PMC3979039; doi:10.1186/ar4440), 2014-01-17
Supplement: ar4440-S1.pdf [file ar4440-S1.pdf]

### Additional File 1

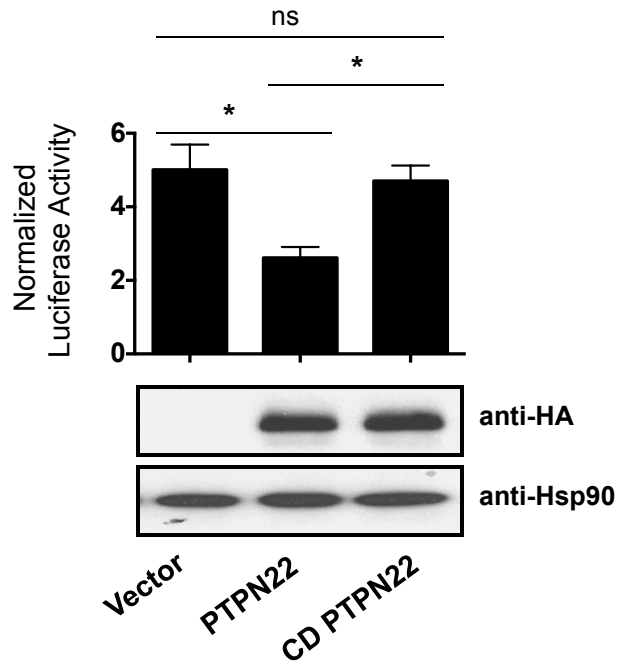

EL4 murine T cells were transfected with a NFAT-luc reporter, 10 ug of pCMV2B expressing indicated HA-tagged mouse PTPN22 or catalytic dead (CD) PTPN22, and a TK-Renilla reporter. The transfected cells were then stimulated with anti-CD3 (1 ug/ml, 145-2C11, Cat. #100331, BioLegend) overnight. A fraction of the transfected cells was subjected to Western blotting with anti-HA (3F10, Cat. #11867423001, Roche) or anti-Hsp90. The luciferase activity of the remaining cells was analyzed. Normalized firefly luciferase activity was calculated as described in *Methods* and is shown. In each experiment, the normalized value from cells transfected with the empty expression vector and un-stimulated was arbitrarily set as 1. The data shown are the means and standard deviations of three independent experiments. Statistical significance was calculated with one-way ANOVA followed by Tukey's test.
