# Supplementary material for: Altered expression of protein tyrosine phosphatase, non-receptor type 22 isoforms in systemic lupus erythematosus
Source: PubMed Central journal article supplement (PMC3979039; doi:10.1186/ar4440), 2014-01-17
Supplement: ar4440-S2.pdf [file ar4440-S2.pdf]

Additional File 2

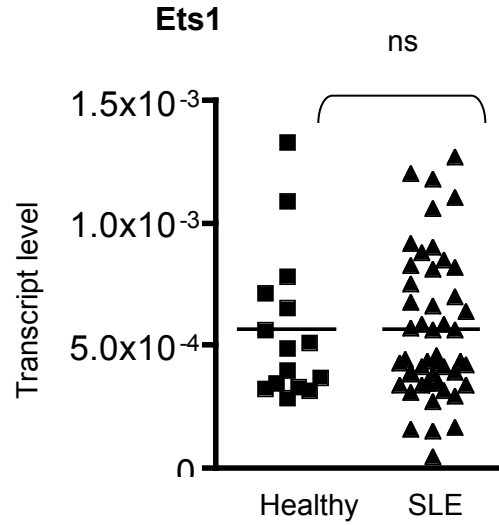

RNA described in Figure 4 was also subjected to real time PCR analysis using Ets-1-specific primers. The transcript level thus obtained was normalized against that of  $\beta$ -actin obtained from the same sample and is shown.
